# Supplementary material for: The Maternal Maverick/GDF15-like TGF-β Ligand Panda Directs Dorsal-Ventral Axis Formation by Restricting Nodal Expression in the Sea Urchin Embryo
Source: PubMed Central journal article supplement (PMC4564238; doi:10.1371/journal.pbio.1002247), 2015-09-09
Supplement: pbio.1002247.s005.pdf [file pbio.1002247.s005.pdf]

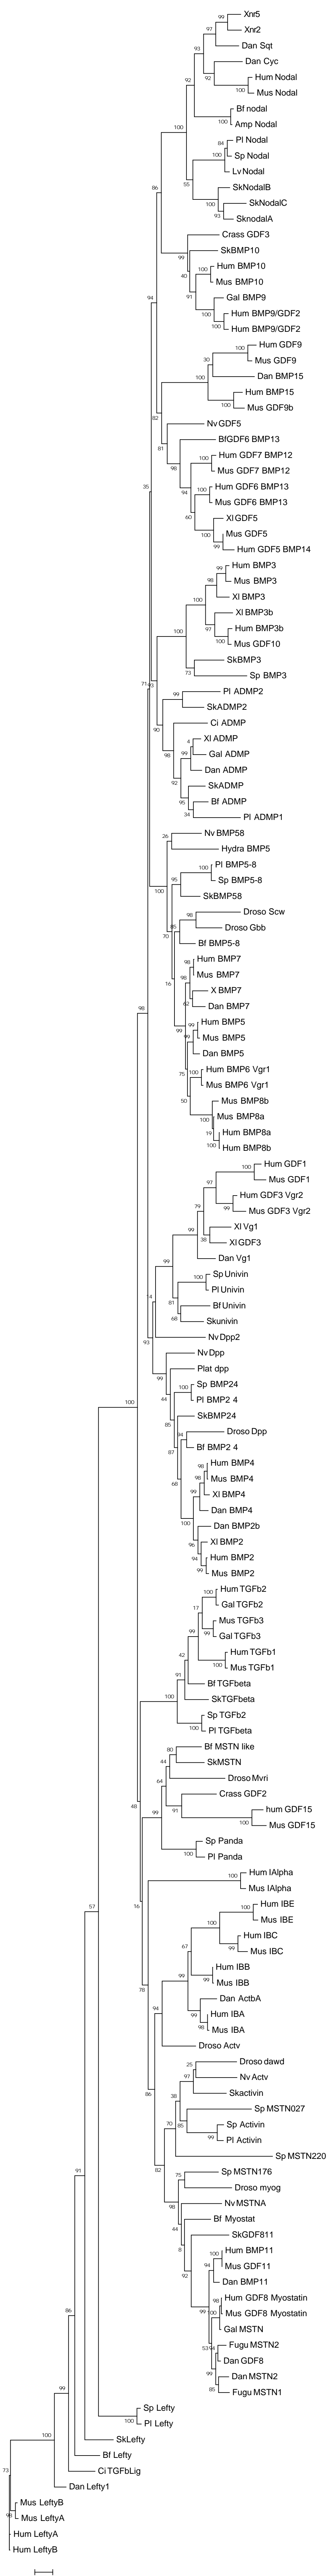

0.5
